# Supplementary material for: Cytotoxicity of Thioalkaloid-Enriched Nuphar lutea Extract and Purified 6,6′-Dihydroxythiobinupharidine in Acute Myeloid Leukemia Cells: The Role of Oxidative Stress and Intracellular Calcium
Source: MDPI journal article supplement (doi:10.3390/ph15040410), 2022-03-28
Supplement: s1 [file s1]

# Cytotoxicity of thioalkaloid-enriched *Nuphar lutea* extract and purified 6,6'-dihydroxythiobinupharidine in acute myeloid leukemia cells: The role of oxidative stress and intracellular calcium

Suchismita Muduli <sup>1</sup>, Avi Golan-Goldhirsh <sup>2</sup>, Jacob Gopas <sup>3,4</sup> and Michael Danilenko <sup>1\*</sup>

<sup>1</sup> Department of Clinical Biochemistry & Pharmacology, Faculty of Health Sciences, Ben-Gurion University of the Negev, Beer Sheva, Israel; [muduli@post.bgu.ac.il](mailto:muduli@post.bgu.ac.il) (S.M.), [misha@bgu.ac.il](mailto:misha@bgu.ac.il) (M.D.)

<sup>2</sup> The Jacob Blaustein Institutes for Desert Research (BIDR), French Associates Institute for Agriculture and Biotechnology of Drylands, Ben-Gurion University of the Negev, Sede Boqer Campus, Israel; [avigolan@bgu.ac.il](mailto:avigolan@bgu.ac.il)

<sup>3</sup> Department of Microbiology, Immunology & Genetics; Faculty of Health Sciences, Ben-Gurion University of the Negev, Beer Sheva, Israel; [jacob@bgu.ac.il](mailto:jacob@bgu.ac.il)

<sup>4</sup> Department of Oncology, Soroka University Medical Center, Beer Sheva, Israel; [jacob@bgu.ac.il](mailto:jacob@bgu.ac.il)

\* Correspondence: [misha@bgu.ac.il](mailto:misha@bgu.ac.il); Tel: +972-8-647-9979

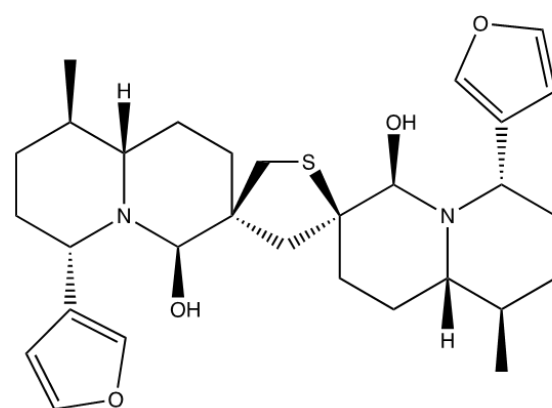

6,6'-dihydroxythiobinupharidine

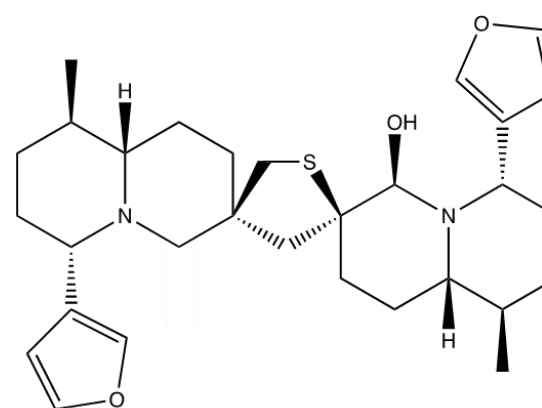

6-hydroxythiobinupharidine

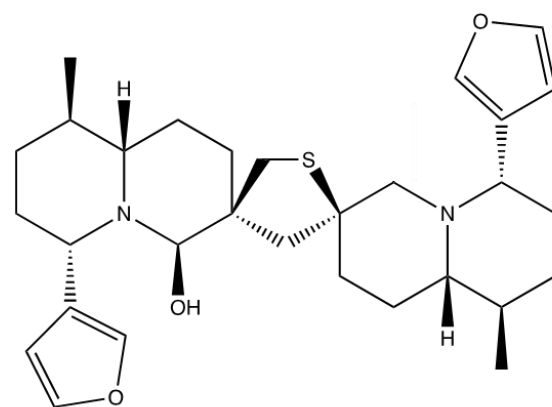

6'-hydroxythiobinupharidine

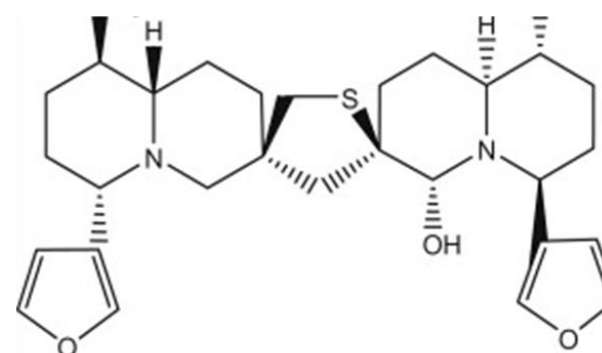

6-hydroxythionuphlutine B

**Supplementary Figure S1.** Chemical structures of several dimeric sesquiterpene thioalkaloids found in NUP.
